# Supplementary material
Source: PubMed Central journal article supplement (PMC4941106)

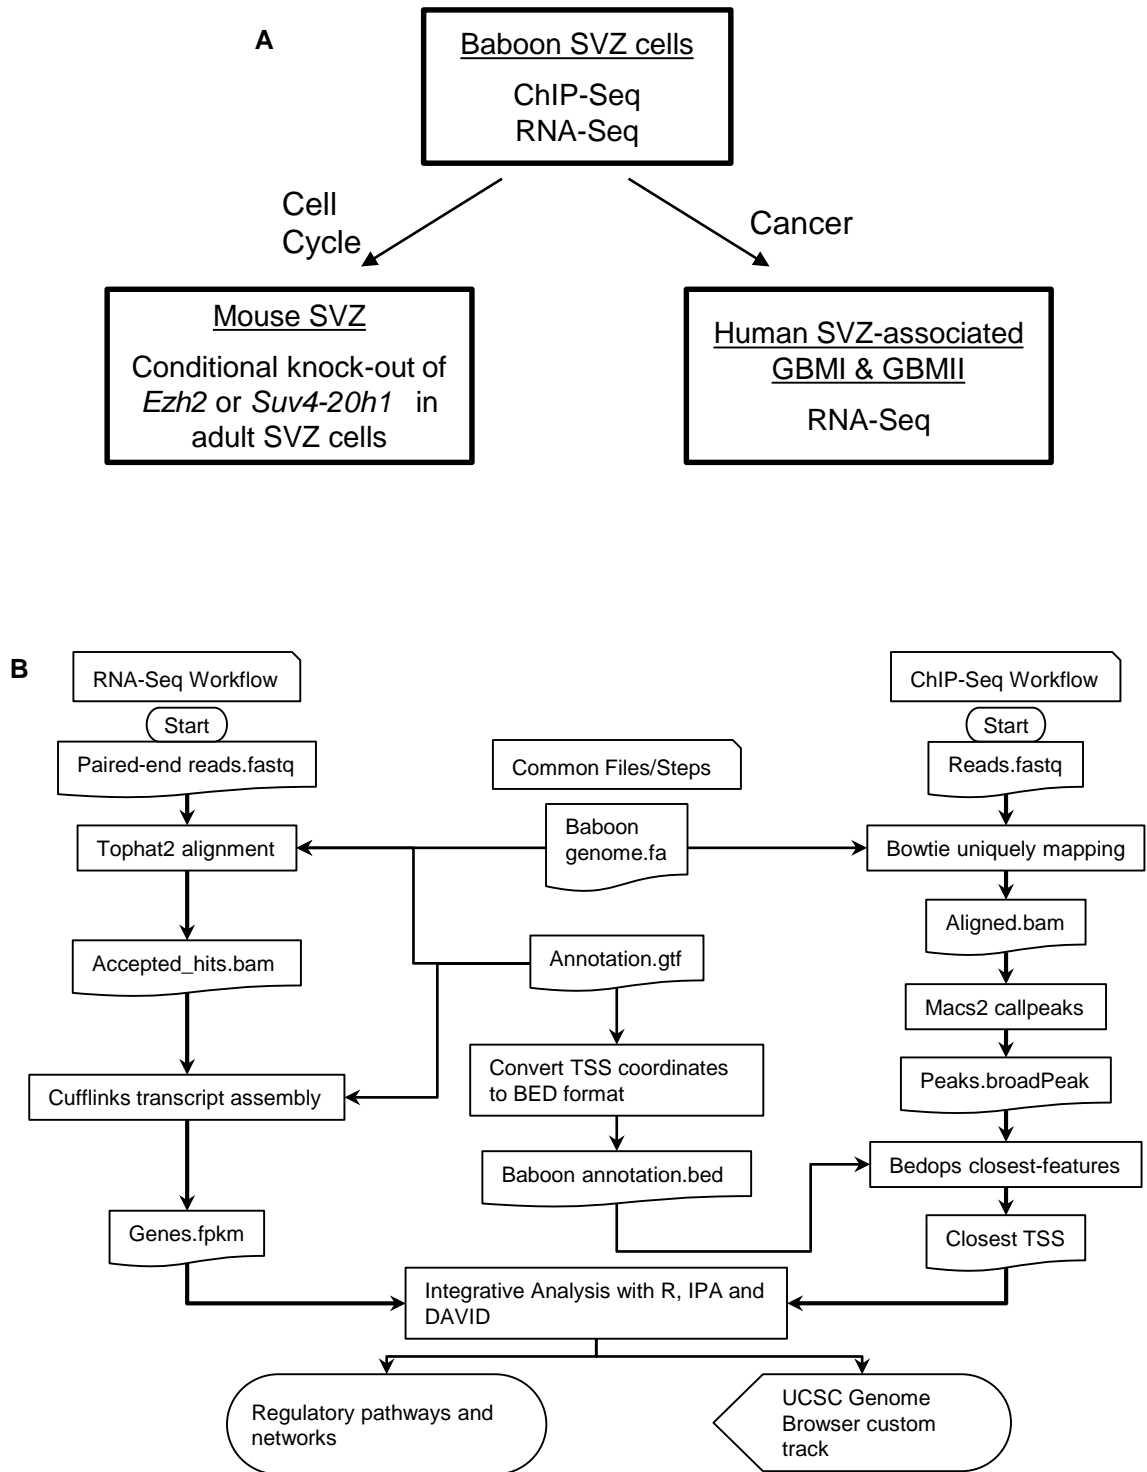

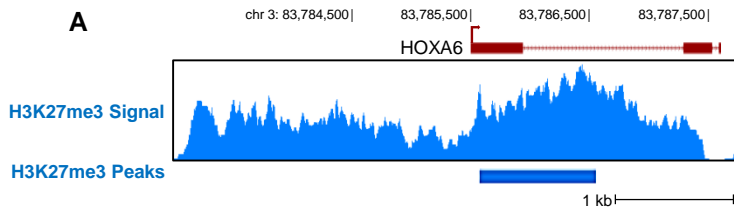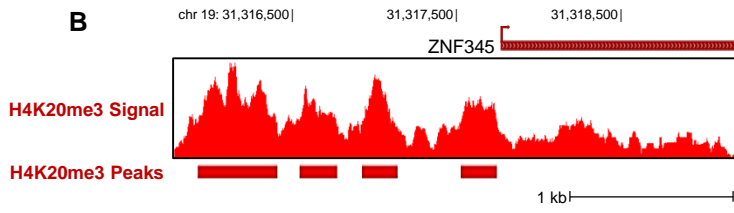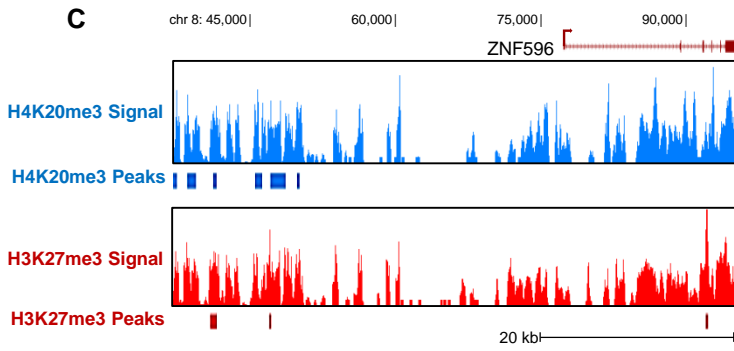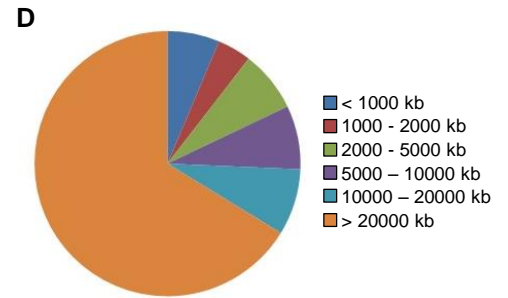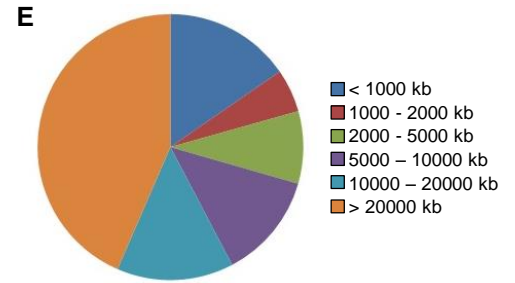

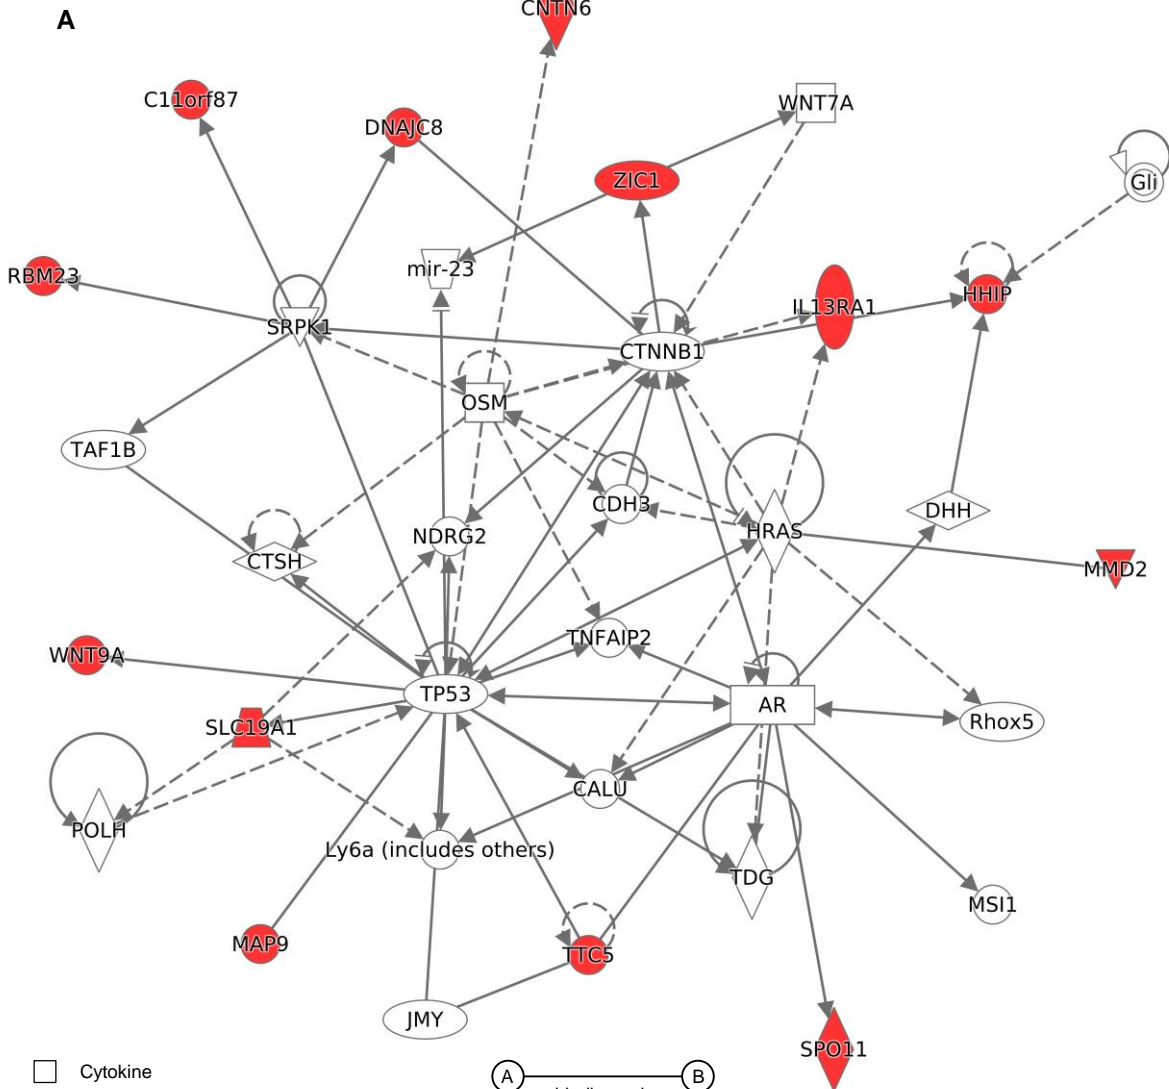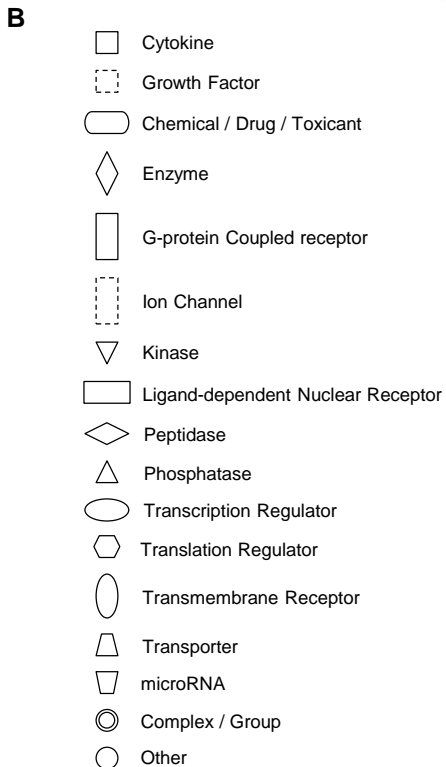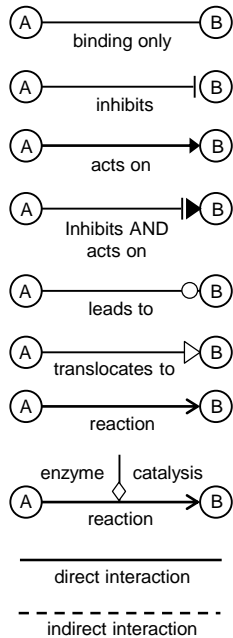

**Notes:** "acts on" and "inhibits" edges may also include a binding event

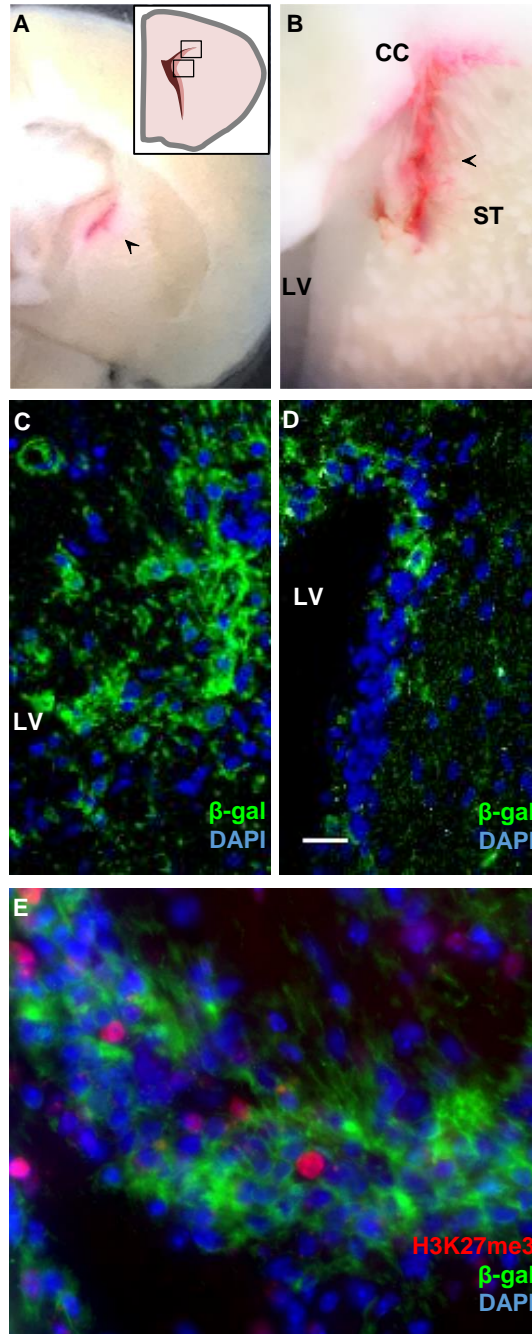

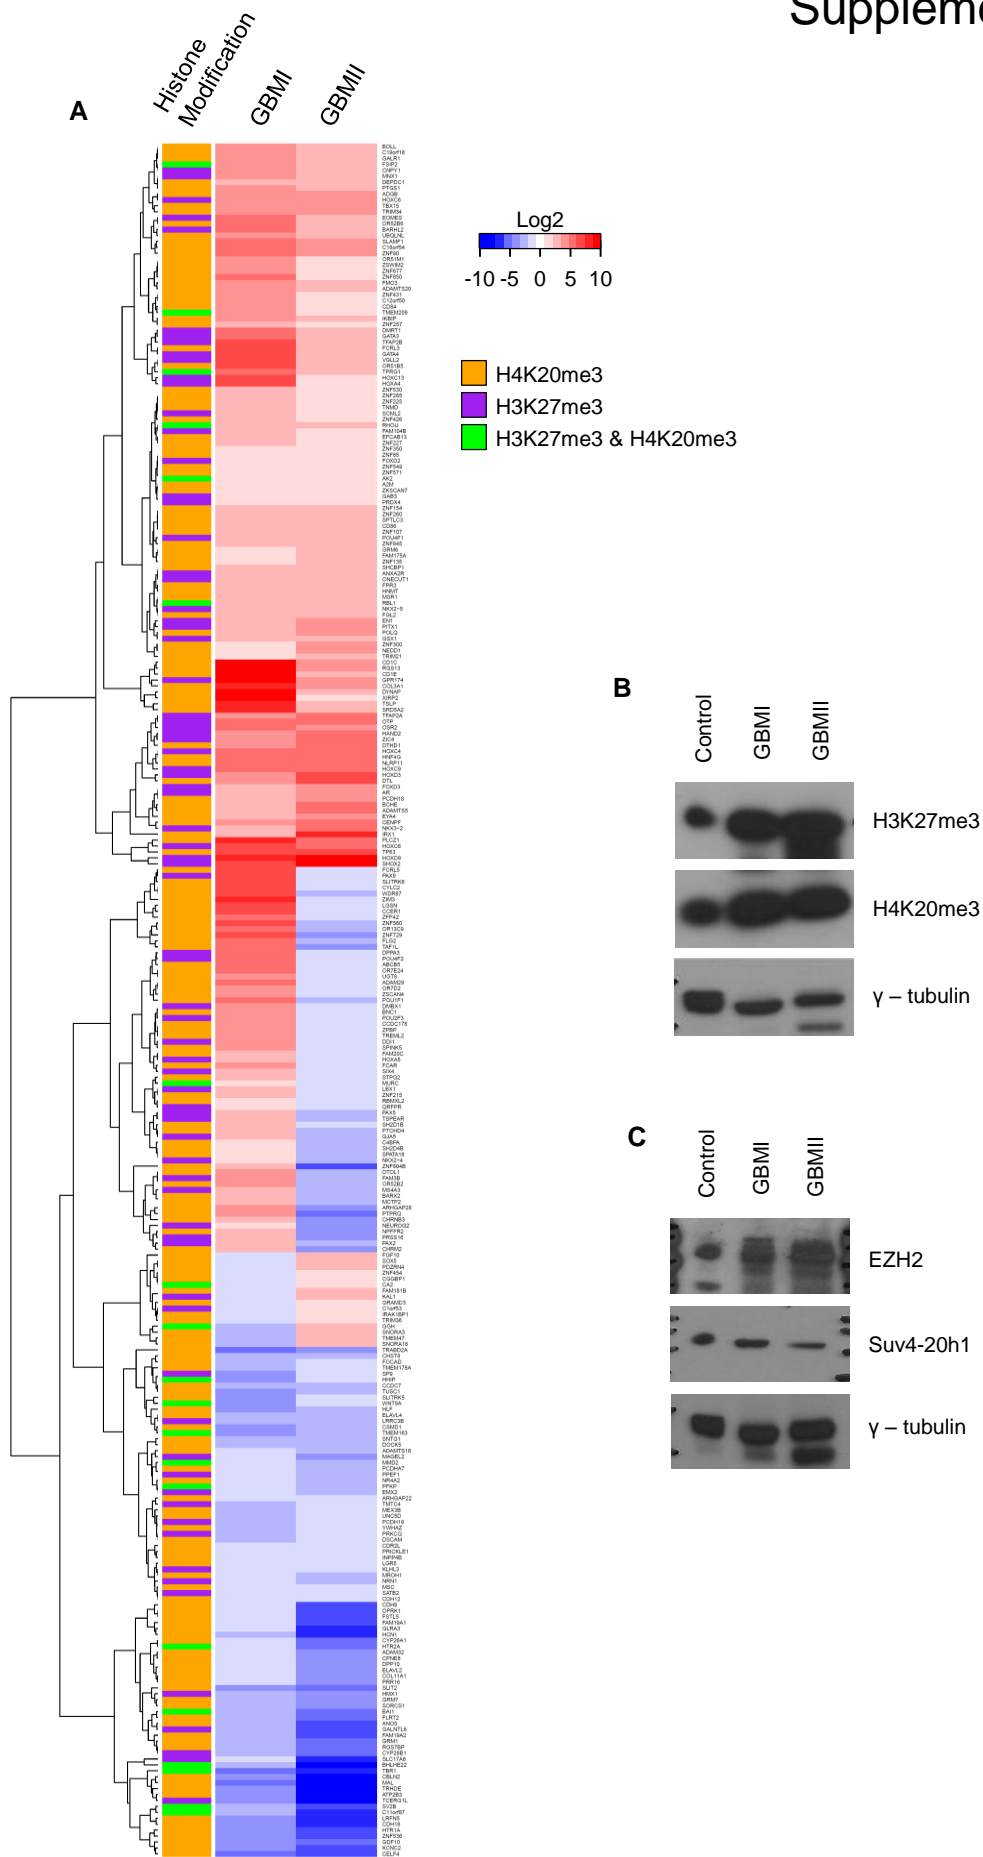

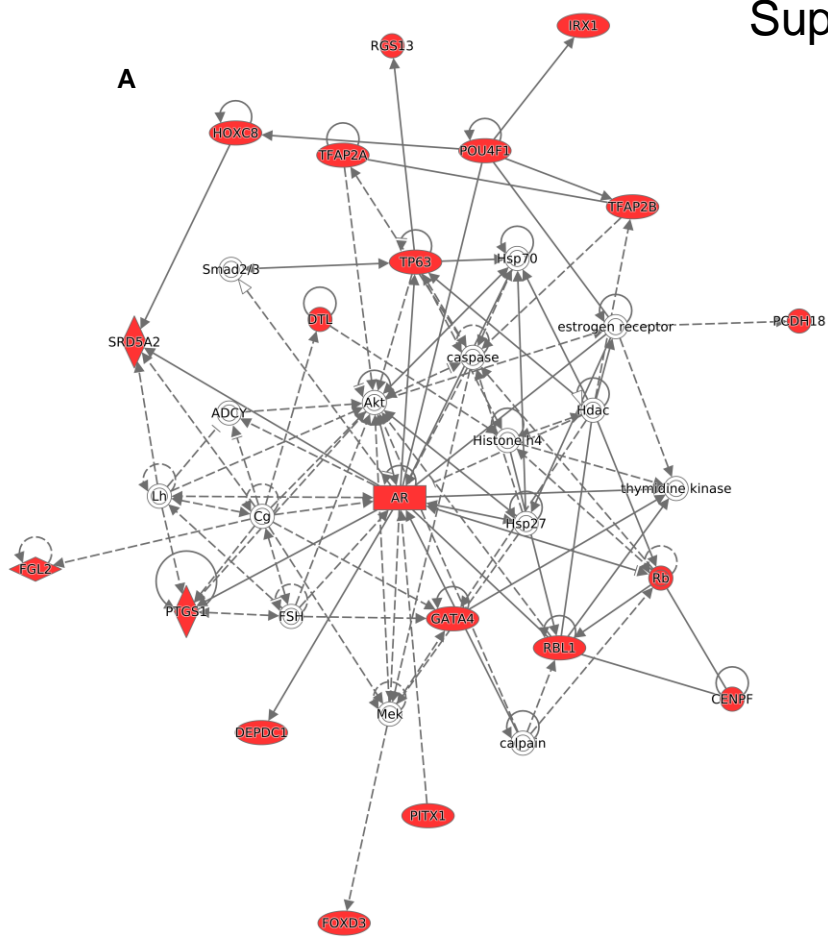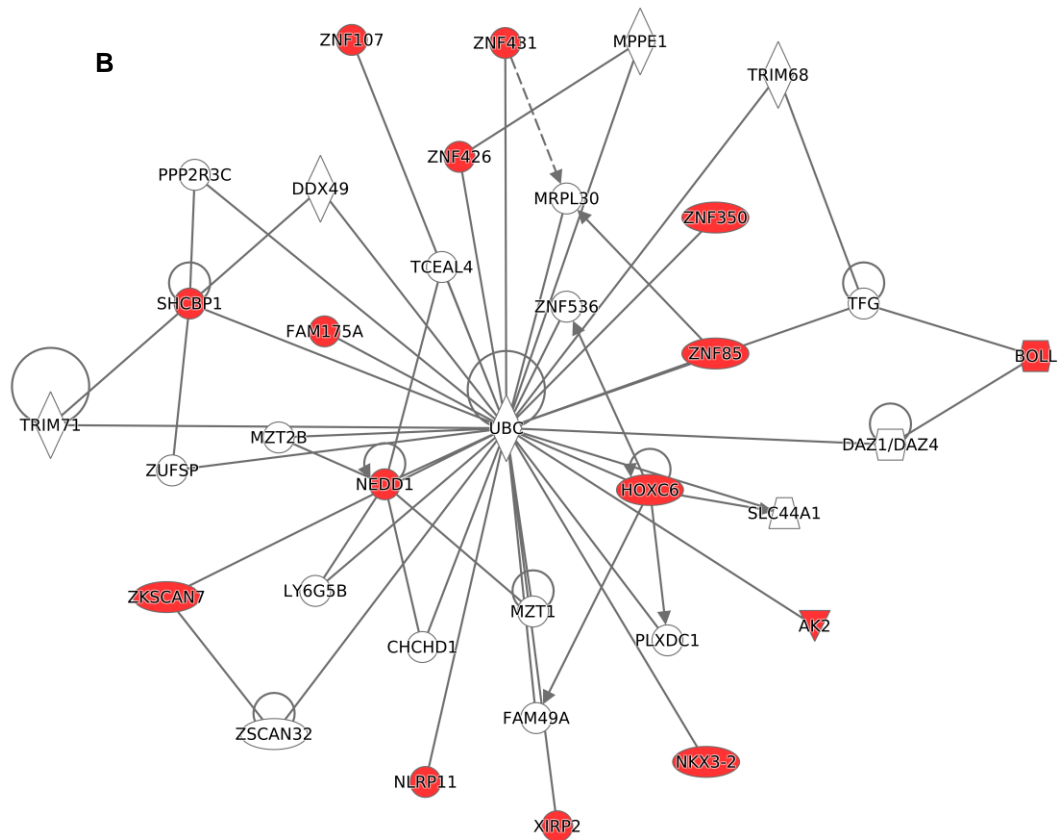

Supplement: NIHMS788977-supplement-1.pdf [file NIHMS788977-supplement-1.pdf]
